# Supplementary figures and images for: “I learned a lot about me as a person”: University students’ development as non-formal education professionals
Source: Frontiers journal article supplement (doi:10.3389/feduc.2024.1444537), 2025-01-16

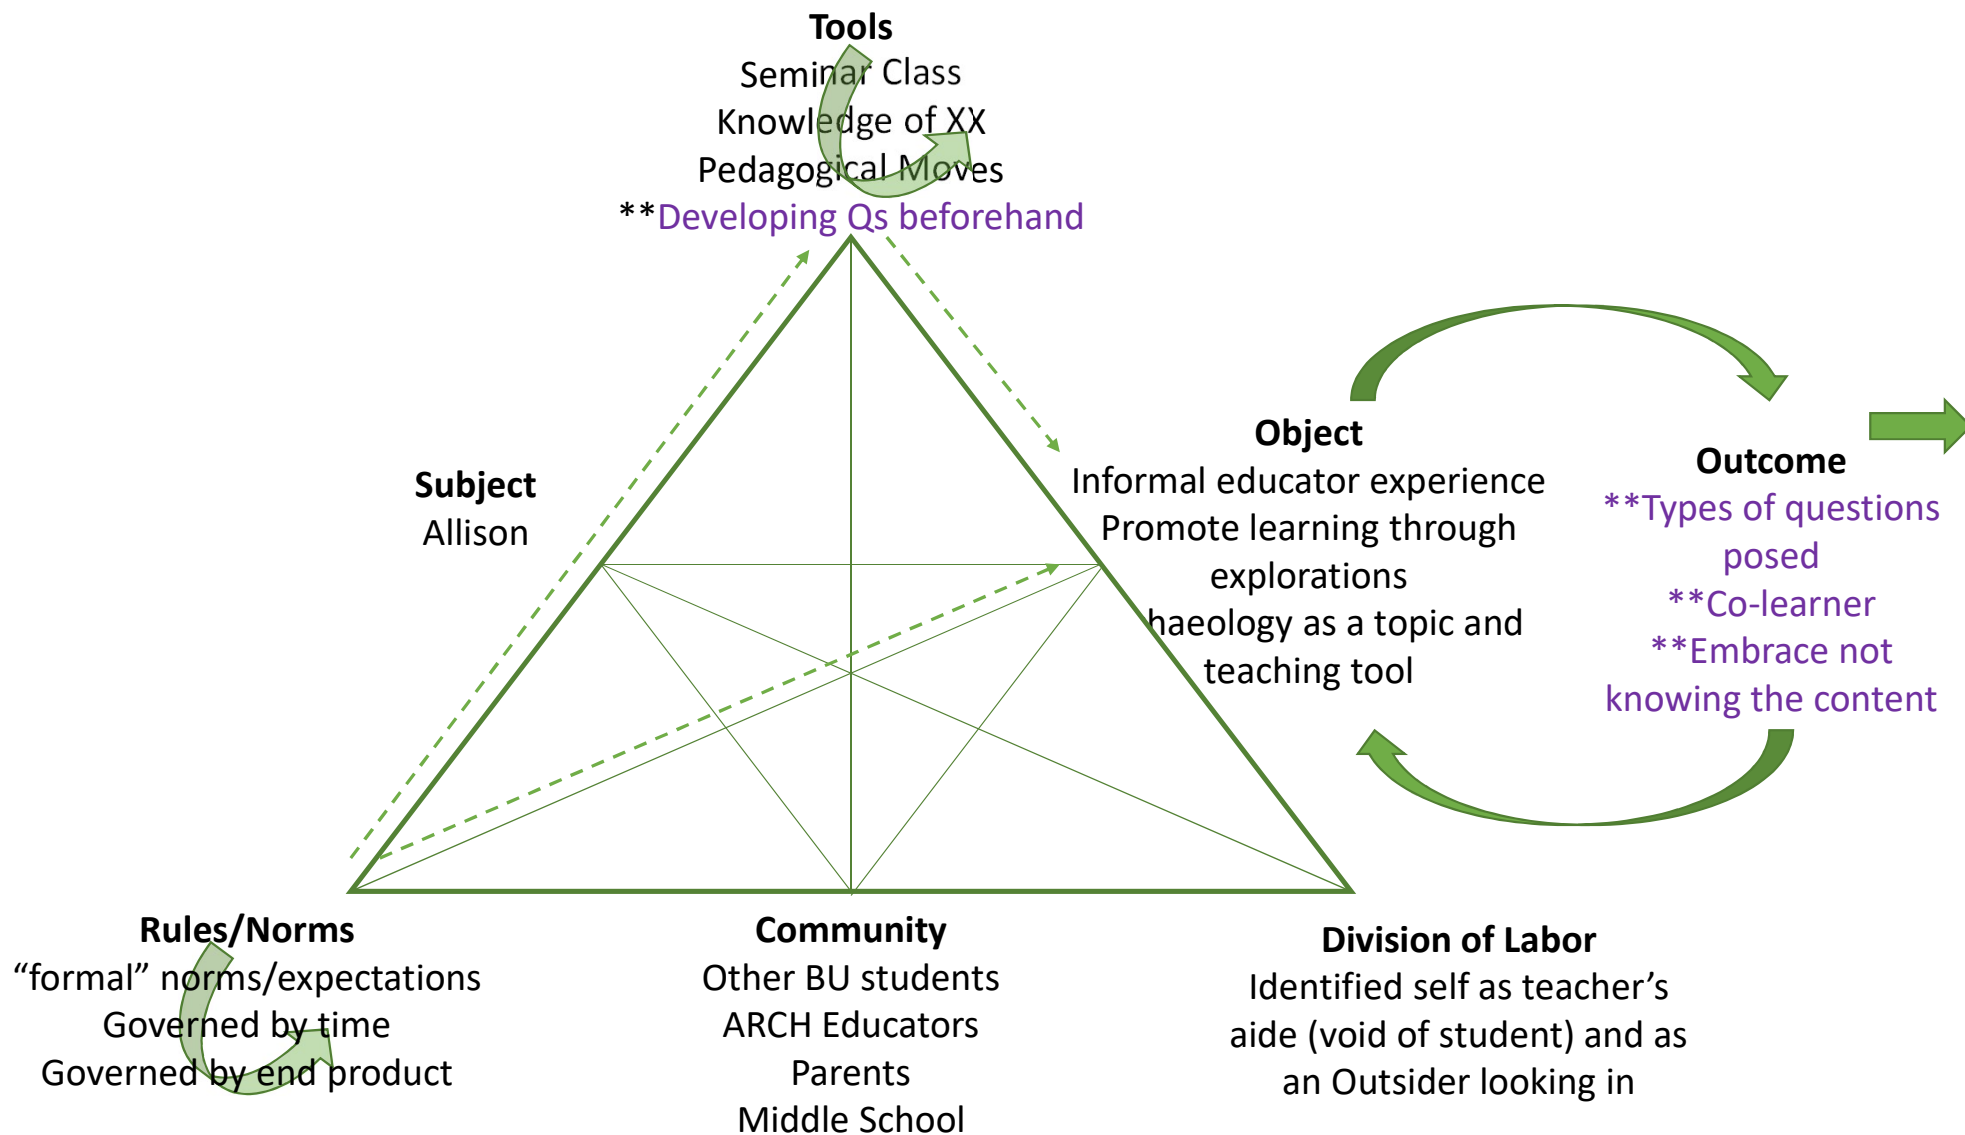

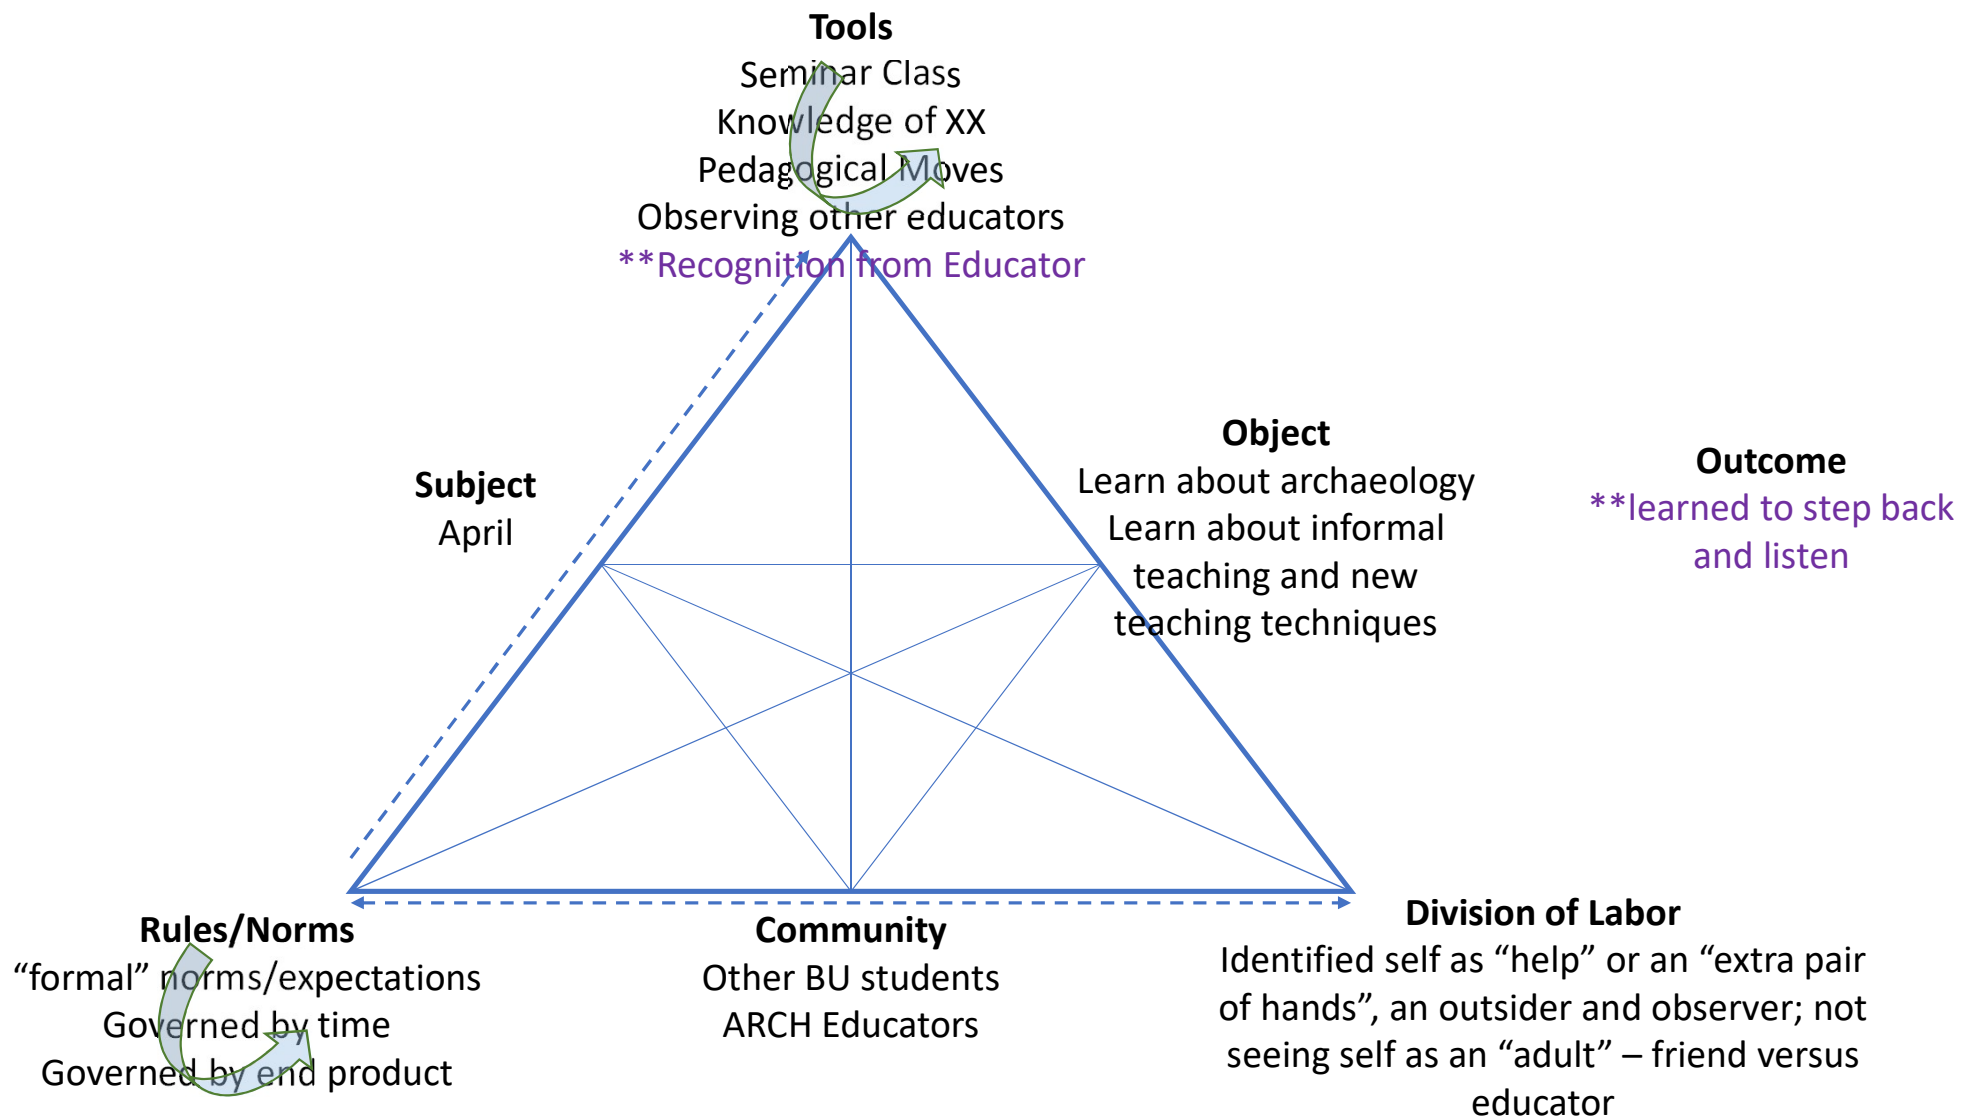

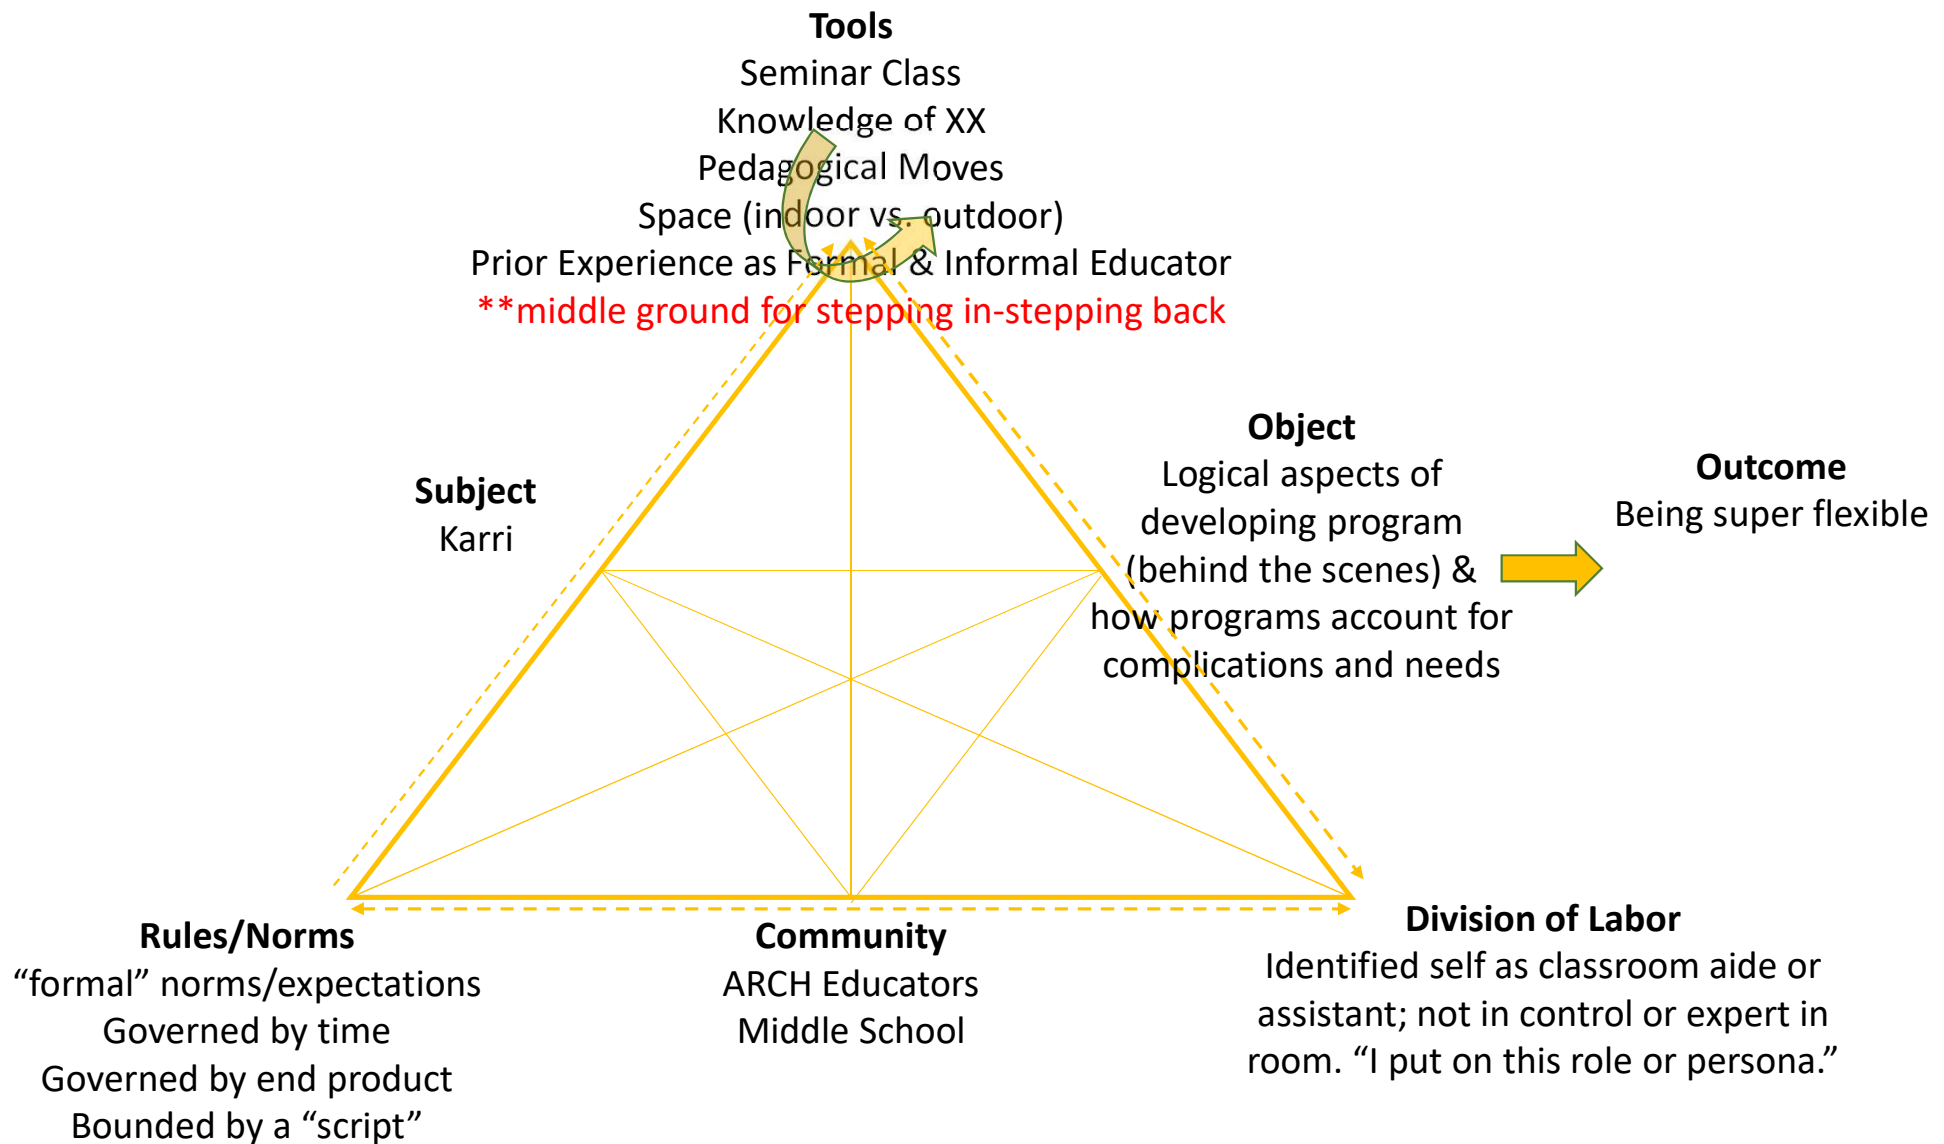

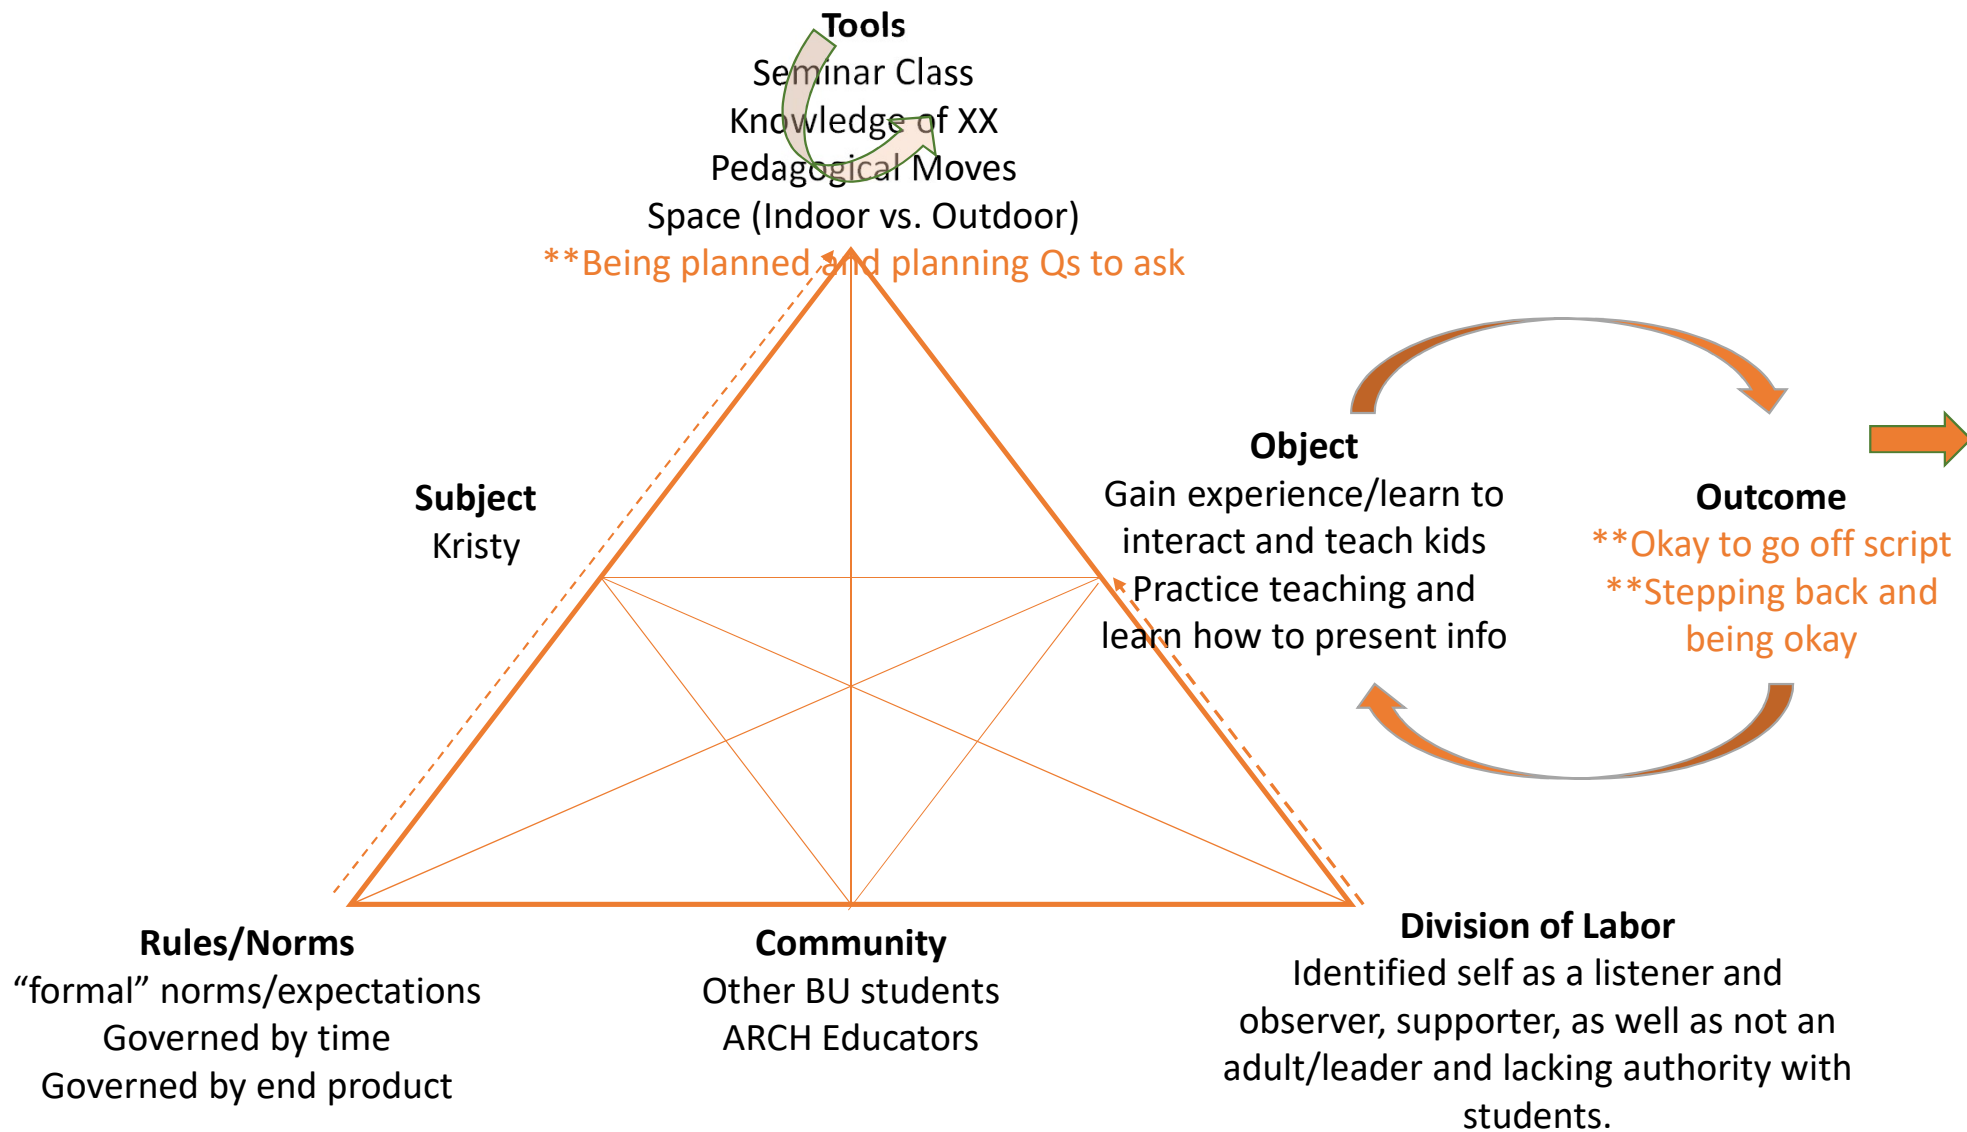

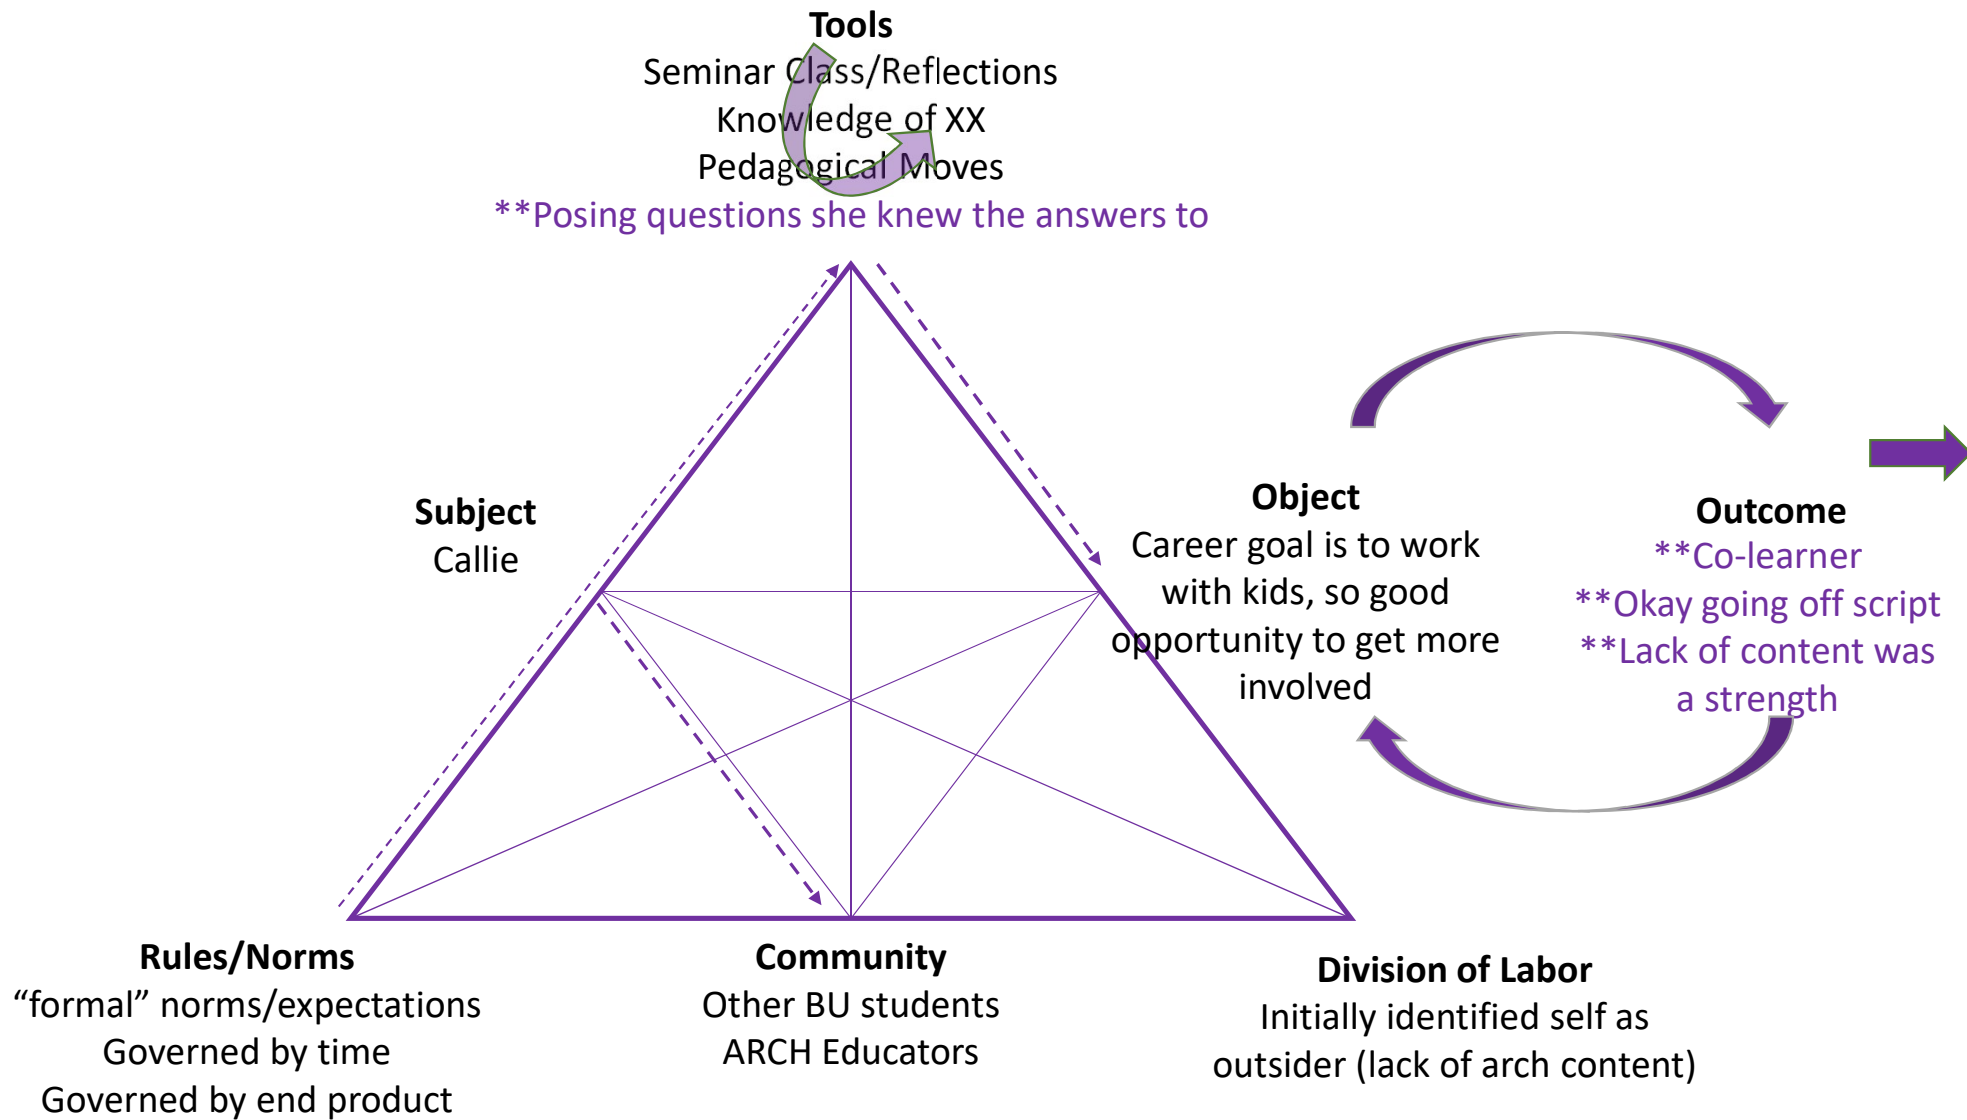

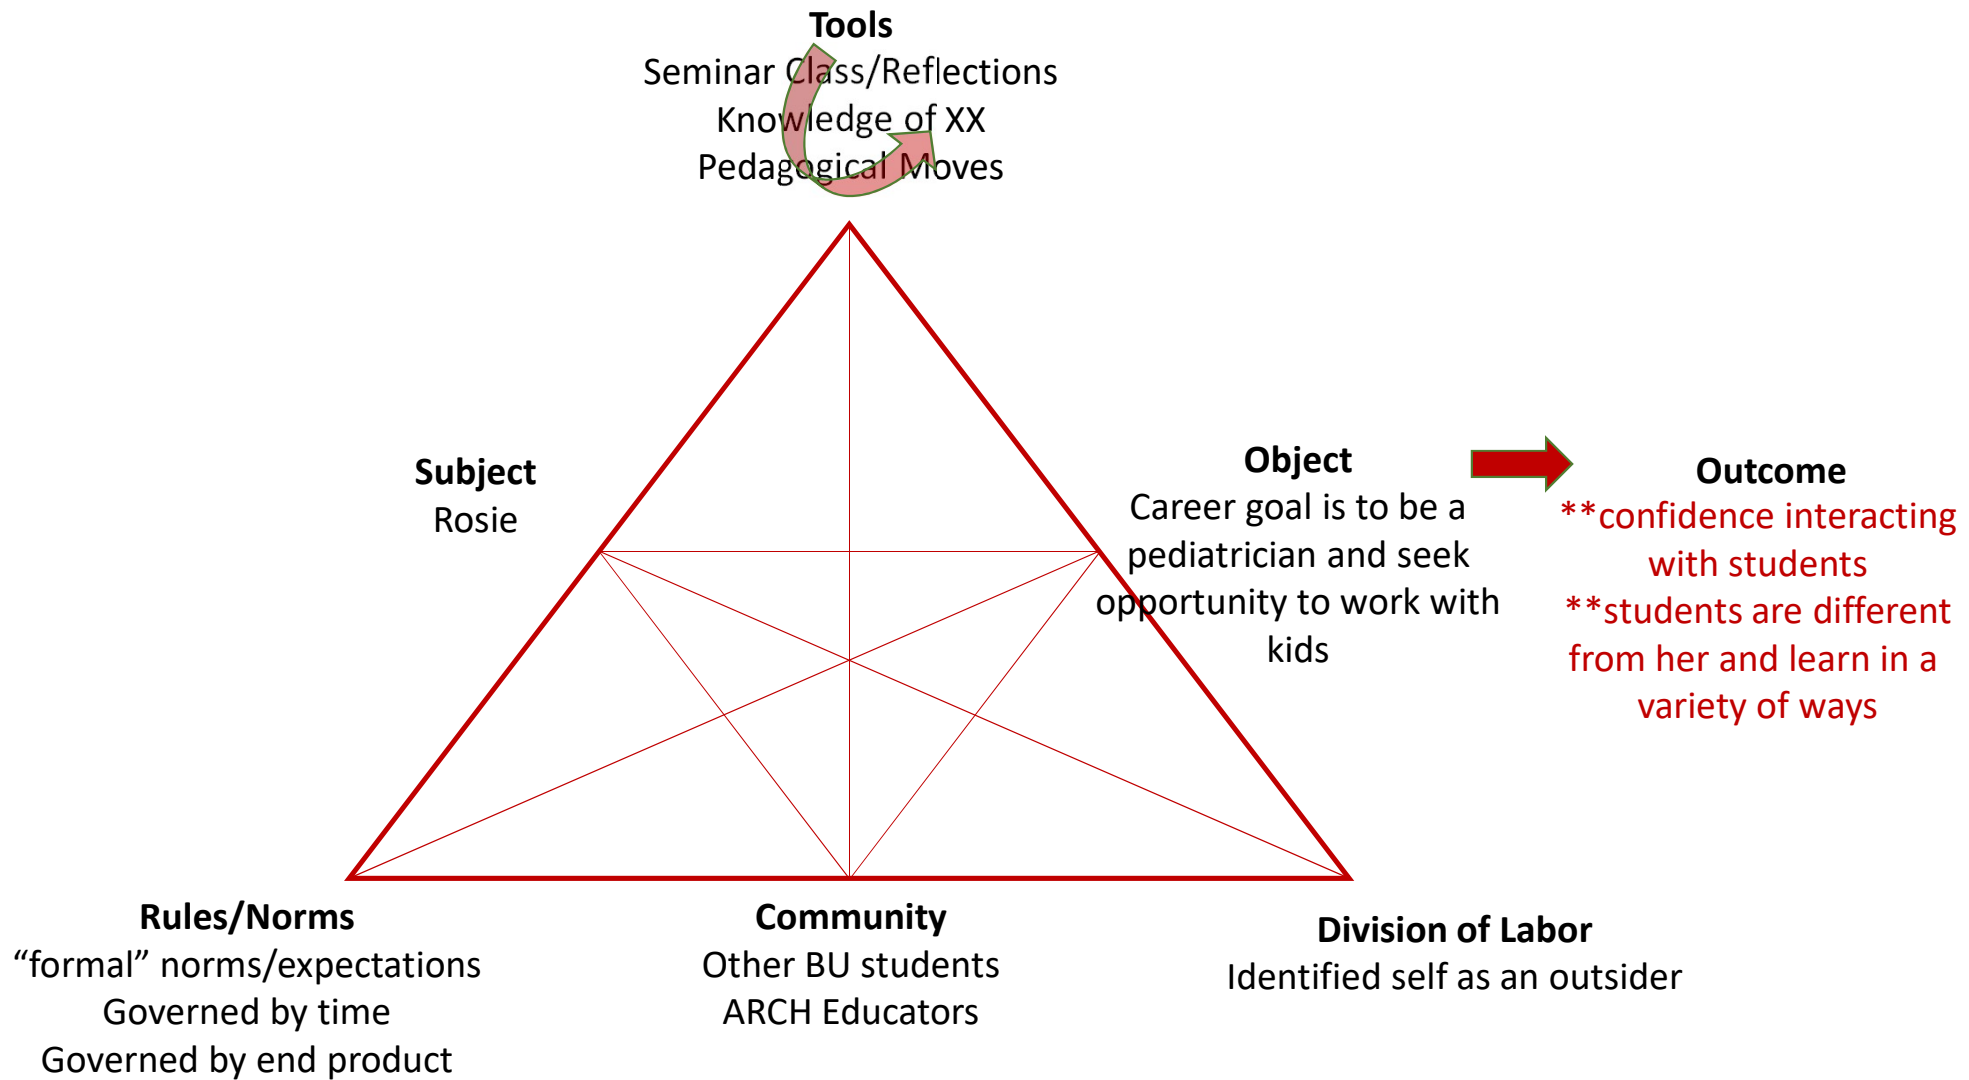

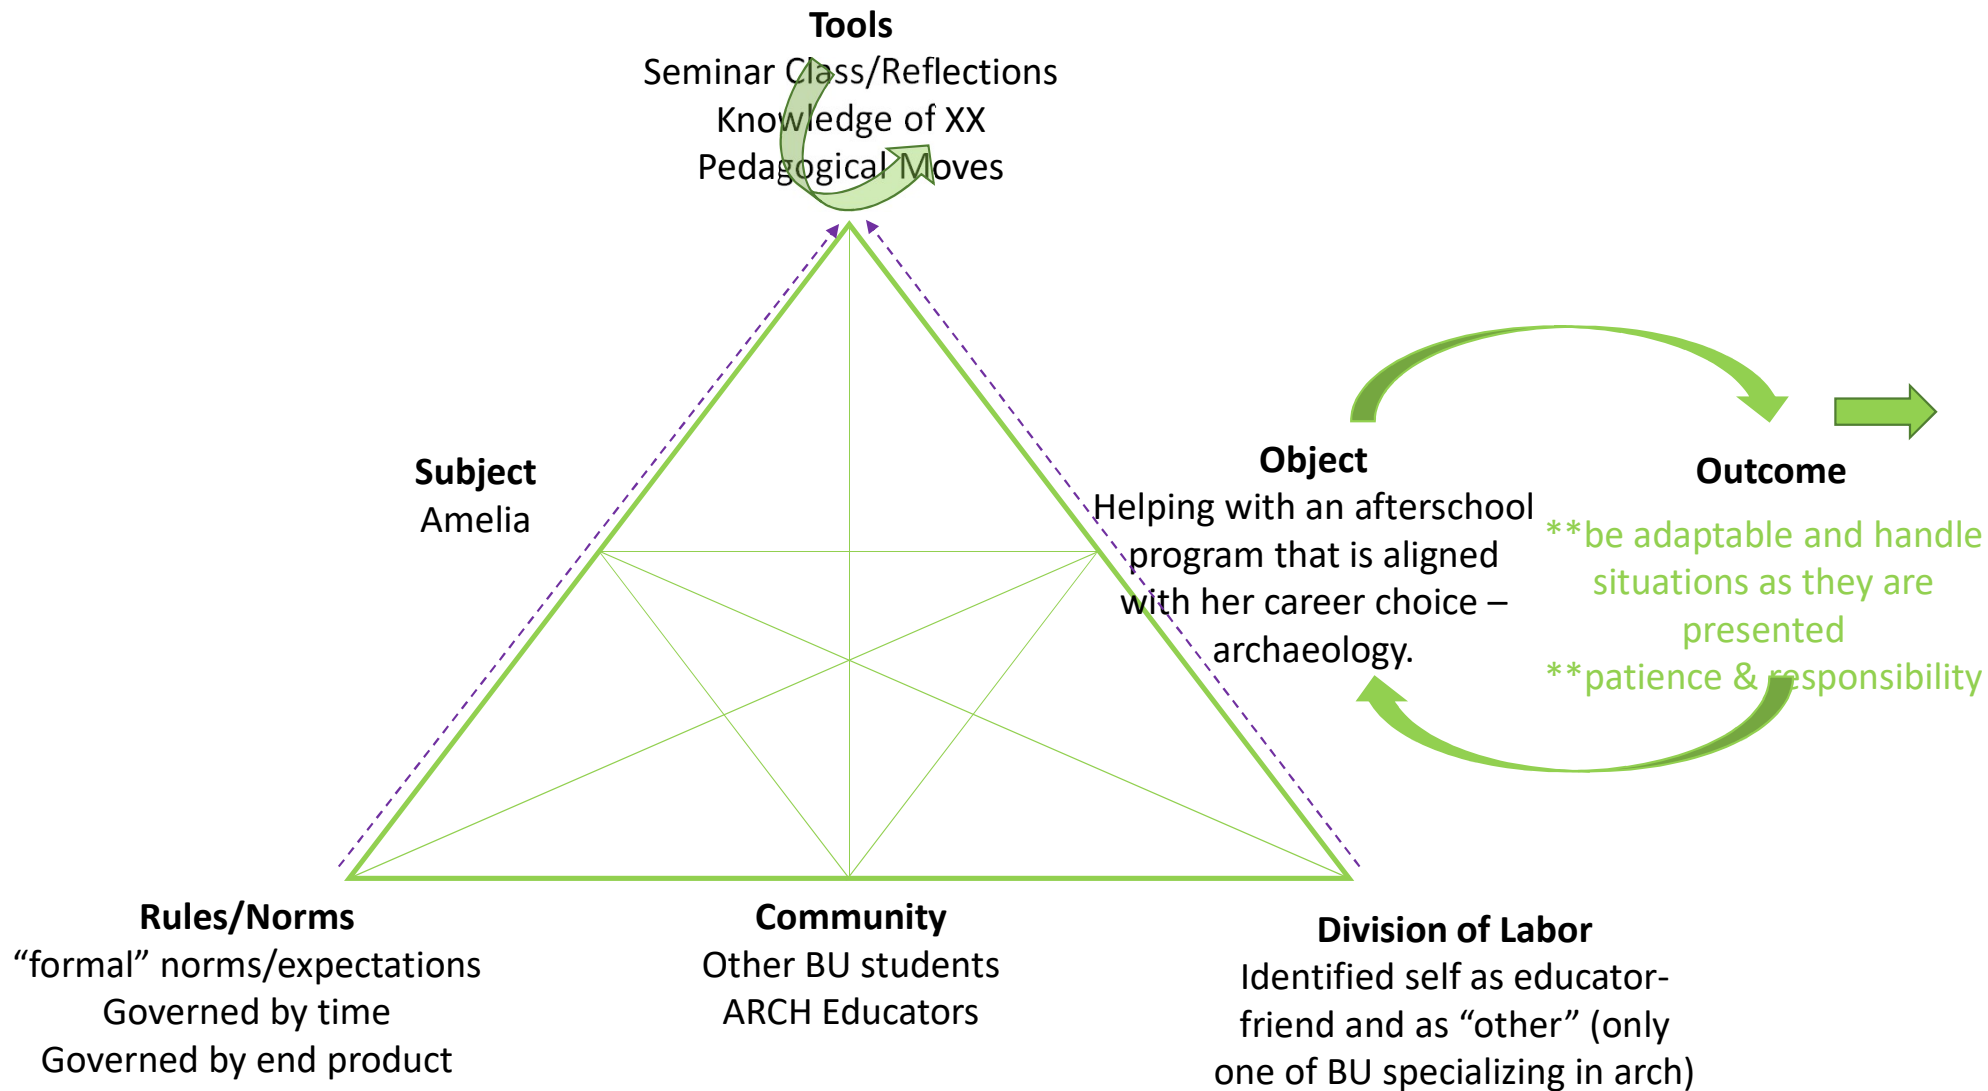

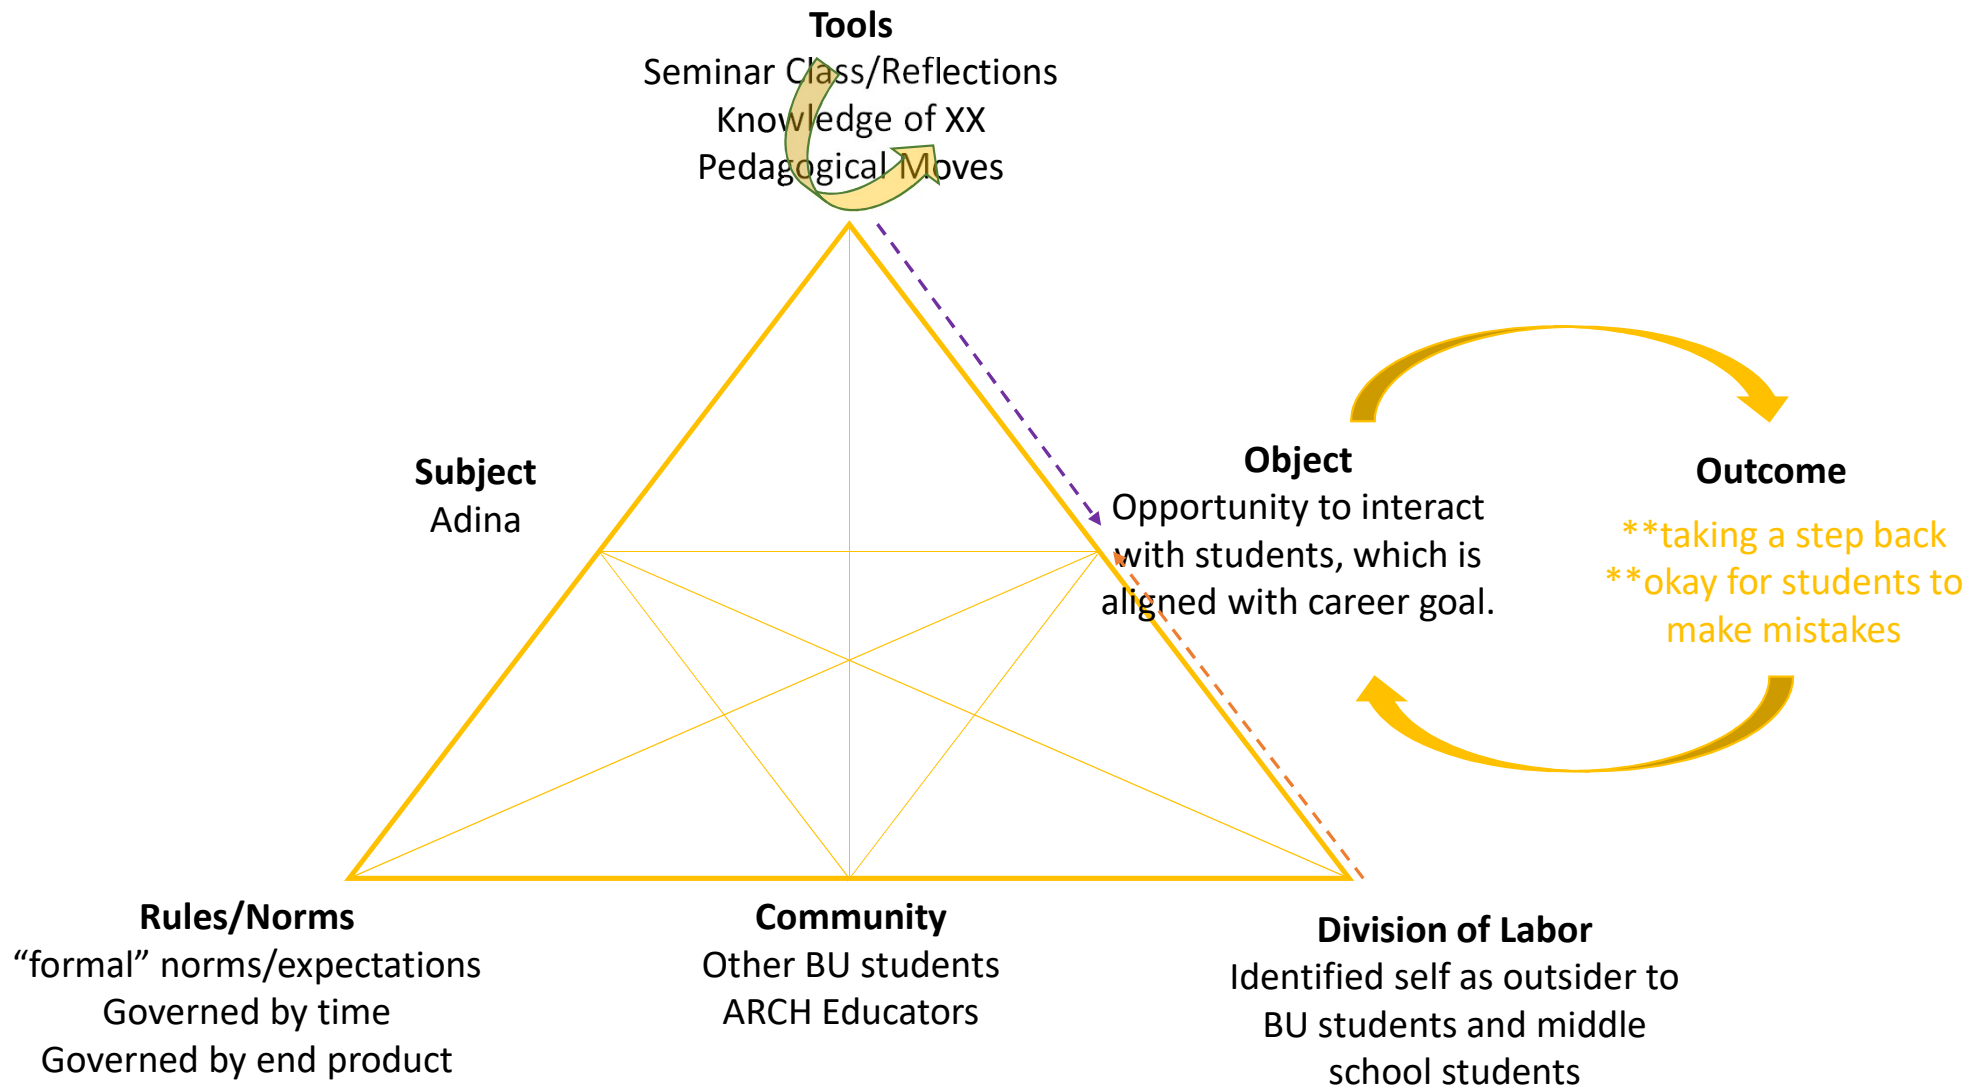

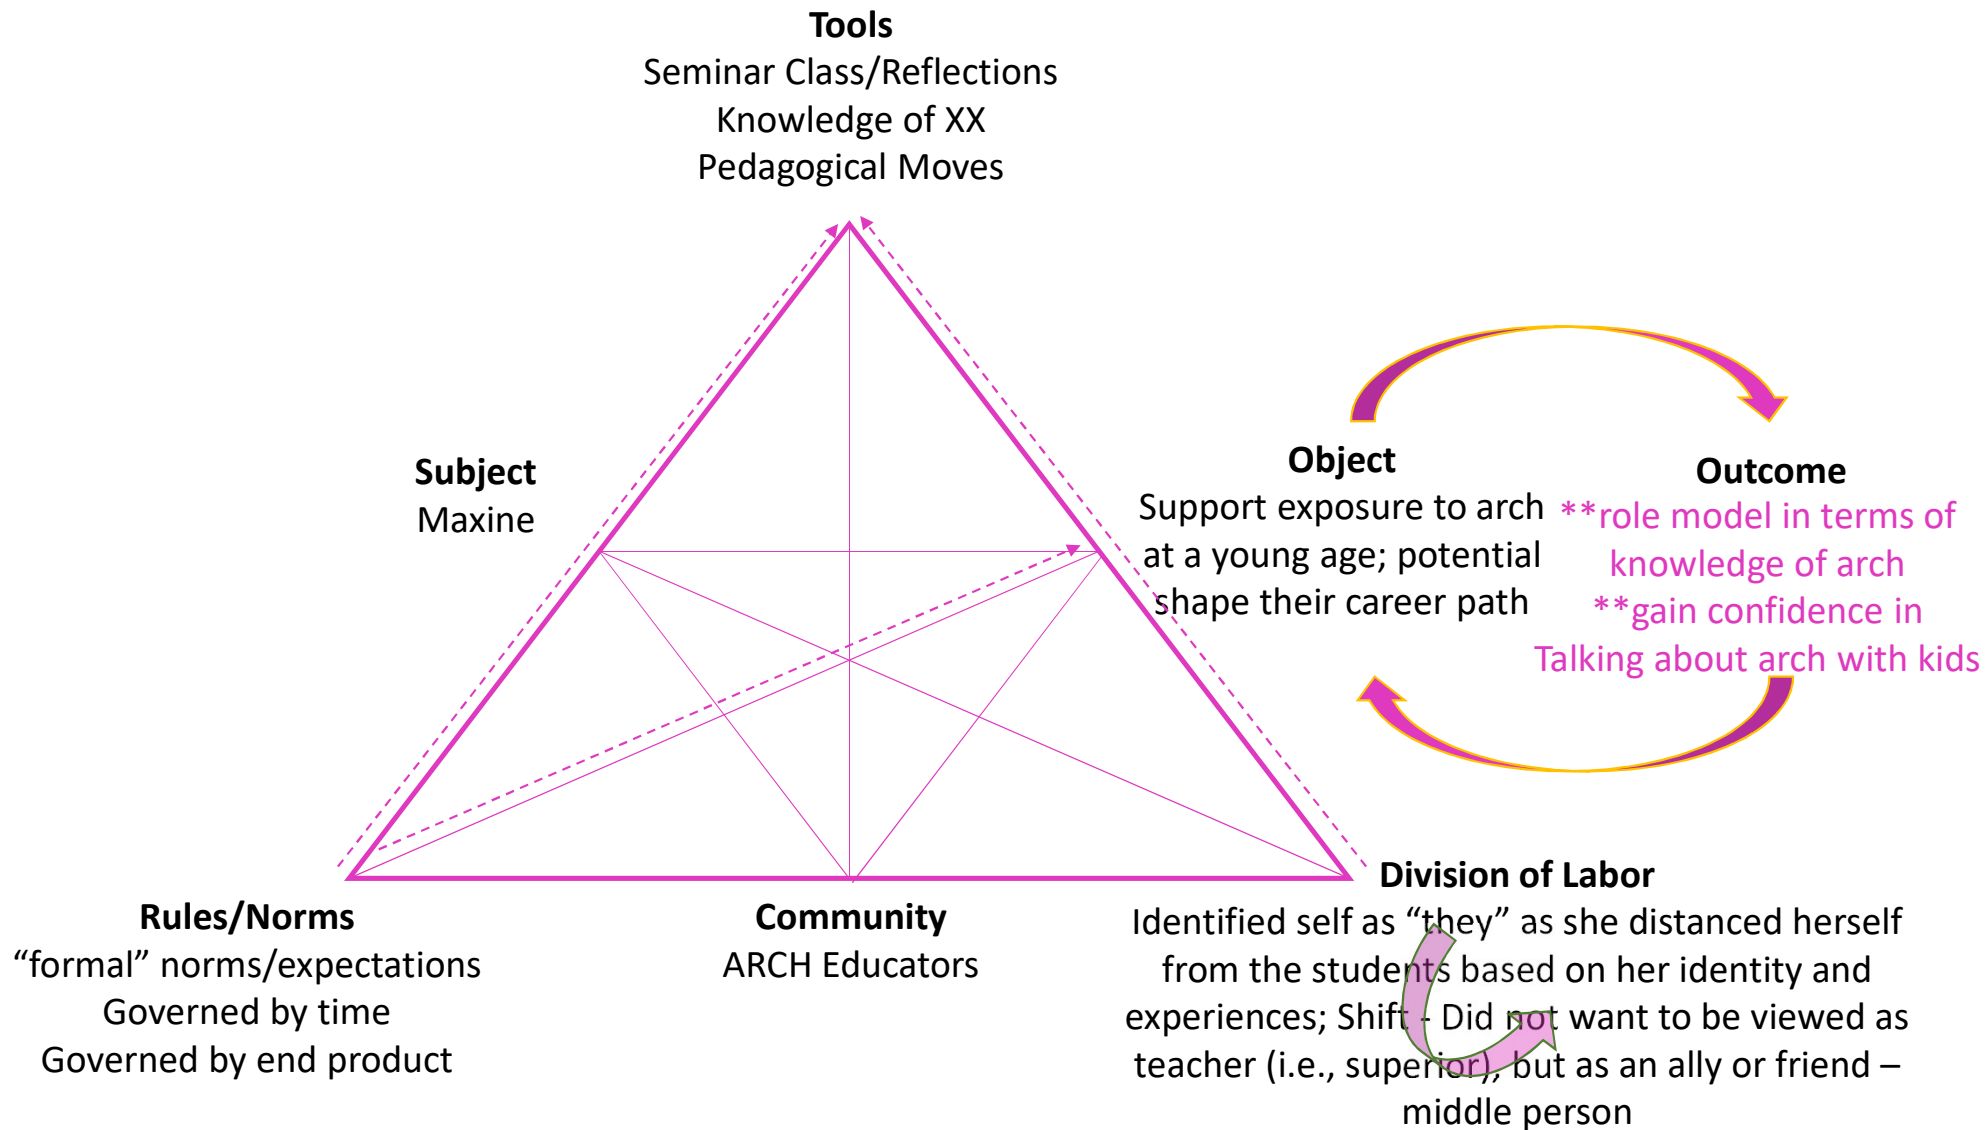

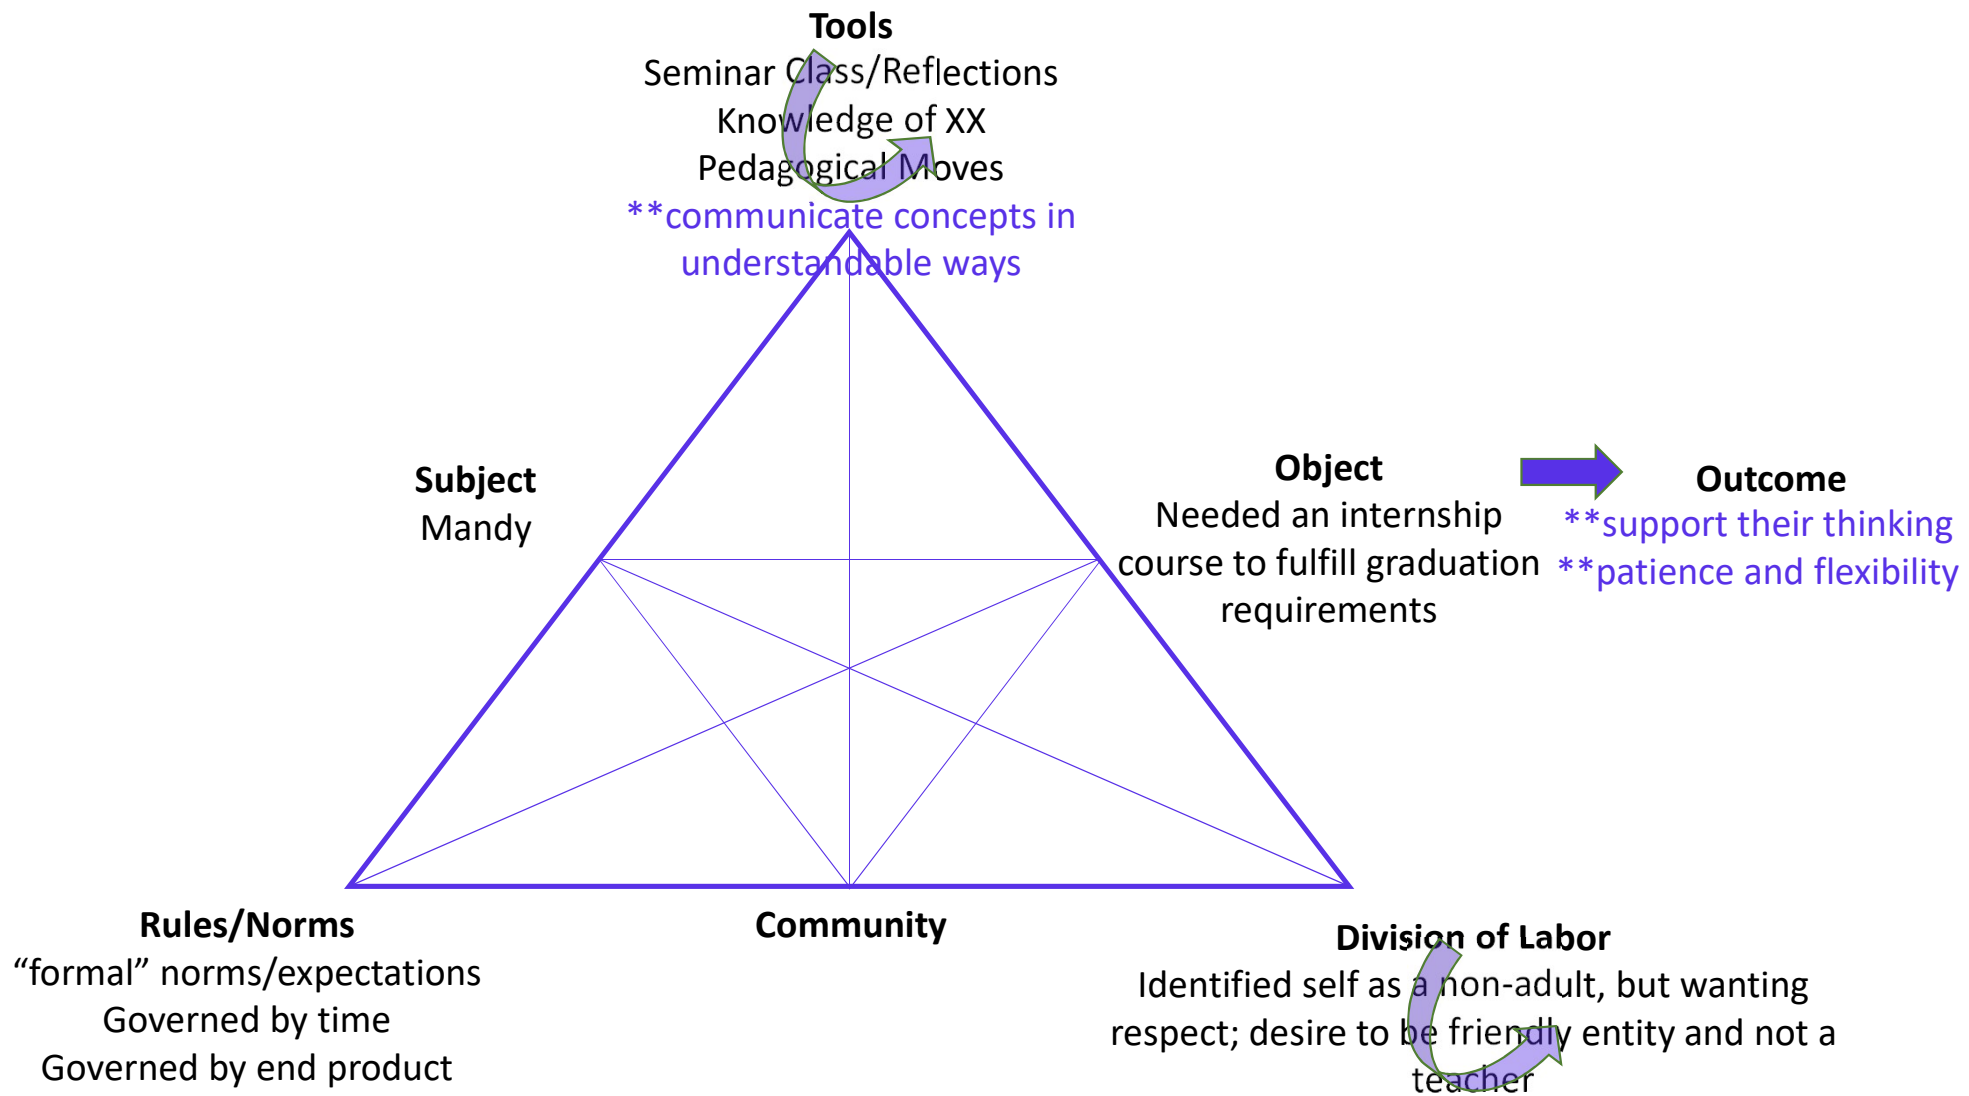

Supplement: Data_Sheet_1.pdf [file Data_Sheet_1.pdf]
